# Supplementary material for: A viscosity-sensitive iridium(iii) probe for lysosomal microviscosity quantification and blood viscosity detection in diabetic mice
Source: Royal Society of Chemistry journal article supplement (doi:10.1039/c9dt00054b), 2019-01-01
Supplement: c9dt00054b1.pdf [file c9dt00054b1.pdf]

## Supporting information

# **A viscosity-sensitive iridium(III) probe for lysosomal microviscosity quantification and blood viscosity detection in diabetic mice†**

Pingyu Zhang,<sup>\*a</sup> Haijie Chen,<sup>a</sup> Huaiyi Huang,<sup>b</sup> Kangqiang Qiu,<sup>a,c</sup> Changxuan Zhang,<sup>a</sup>

Hui Chao<sup>\*a,c</sup> and Qianling Zhang<sup>\*a</sup>

<sup>a</sup>College of Chemistry and Environmental Engineering, Shenzhen University, Shenzhen, 518060, China.

<sup>b</sup>School of Pharmaceutical Sciences (Shenzhen), Sun Yat-Sen University, Guangzhou 510275, China.

<sup>c</sup>School of Chemistry, Sun Yat-Sen University, Guangzhou 510275, China.

## Contents

**Fig. S1.** The MS spectrum of **1**.

**Fig. S2.** The  $^1\text{H}$  NMR spectrum of **1**.

**Fig. S3.** The 600 MHz cosy NMR spectrum of **1**.

**Fig. S4.** The  $^{13}\text{C}$  NMR spectrum of **1**.

**Fig. S5.** The stability of **1** for 72 h.

**Fig. S6.** The emission spectra of **1** in the presence of biological molecules.

**Fig. S7.** The emission intensity of **1** in the solution with different pH values.

**Fig. S8.** The ESI-MS spectrum of **2**.

**Fig. S9.** The  $^1\text{H}$  NMR spectrum of **2**.

**Fig. S10.** The  $^{13}\text{C}$  NMR spectrum of **2**.

**Fig. S11.** The ESI-MS spectrum of **3**.

**Fig. S12.** The  $^1\text{H}$  NMR spectrum of **3**.

**Fig. S13.** The  $^{13}\text{C}$  NMR spectrum of **3**.

**Fig. S14.** The phosphorescence spectra of  $[\text{Ir}(\text{ppy})_2(\text{pyMe})_2]^+$  in the glycerol-water systems.

**Fig. S15.** Confocal images of the cells colabeled with **1** and MitoTracker<sup>®</sup>Red.

**Fig. S16.** Iridium concentrations determined in lysosome by ICP-MS.

**Fig. S17.** Photostability experiment of **1** in the live cells.

**Fig. S18.** Photostability of **1** in the solution.

**Fig. S19.** The cell viabilities of the cells treated with **1**.

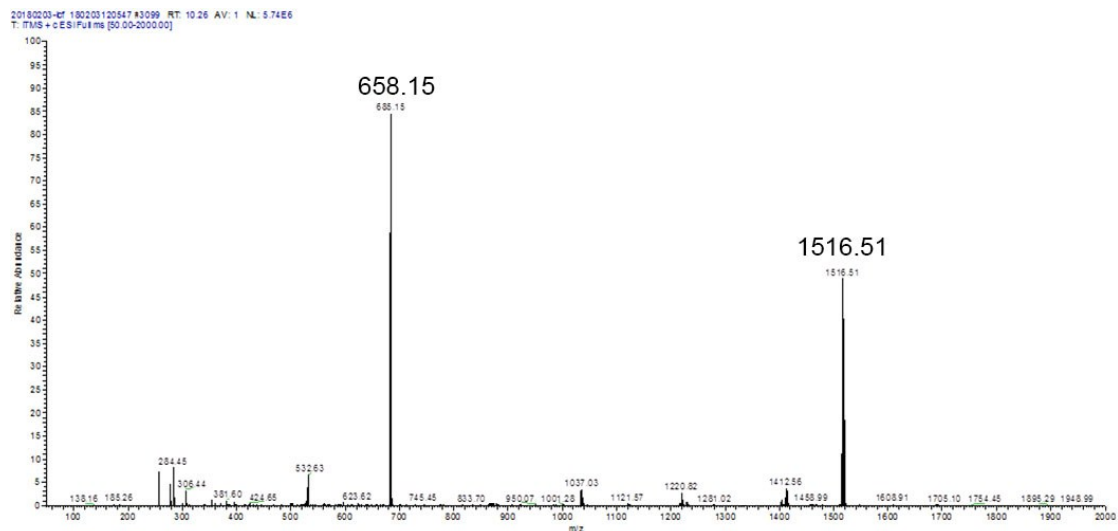

Fig. S1. The ESI-MS spectrum of 1.

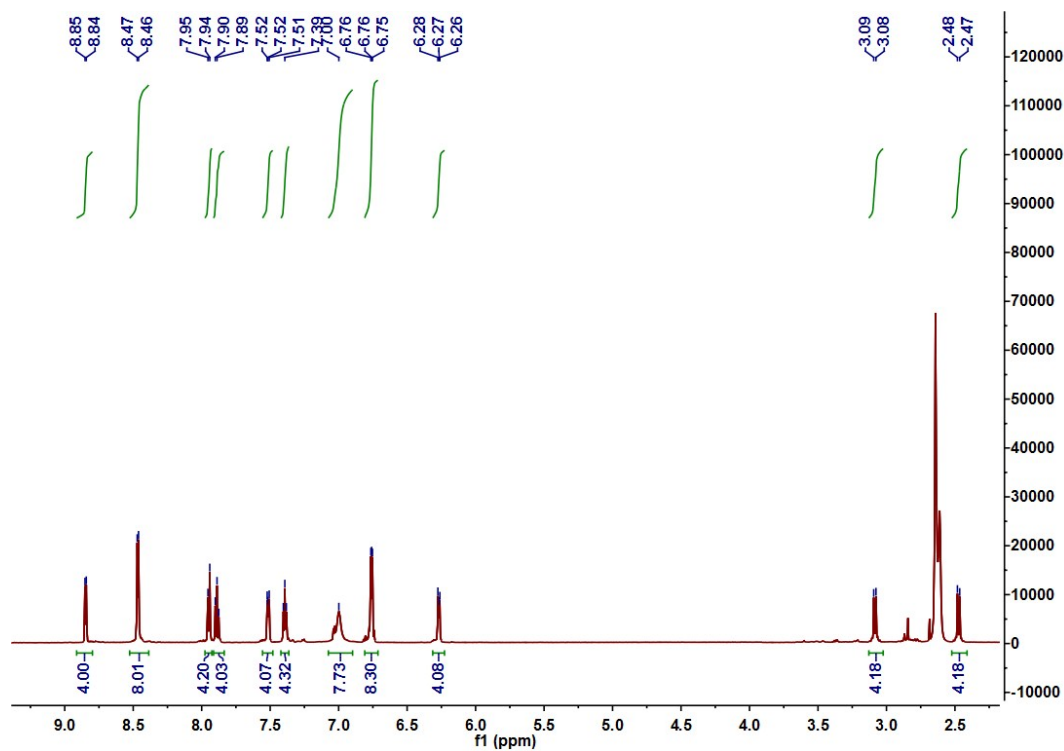

Fig. S2. The 600 MHz  $^1\text{H}$  NMR spectrum of 1 in the  $\text{CD}_3\text{CN}$  solution.

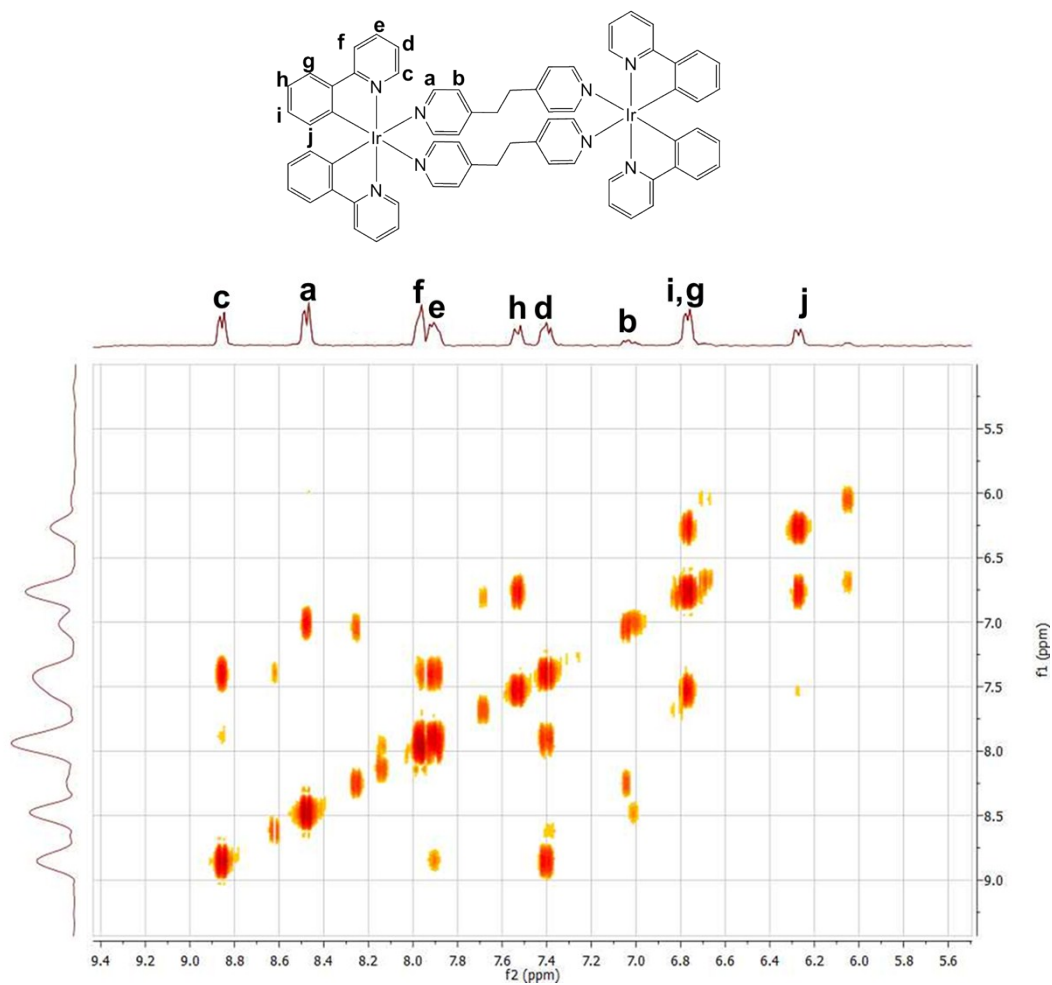

**Fig. S3.** The 600 MHz cosy NMR spectrum of **1** in the CD<sub>3</sub>CN solution.

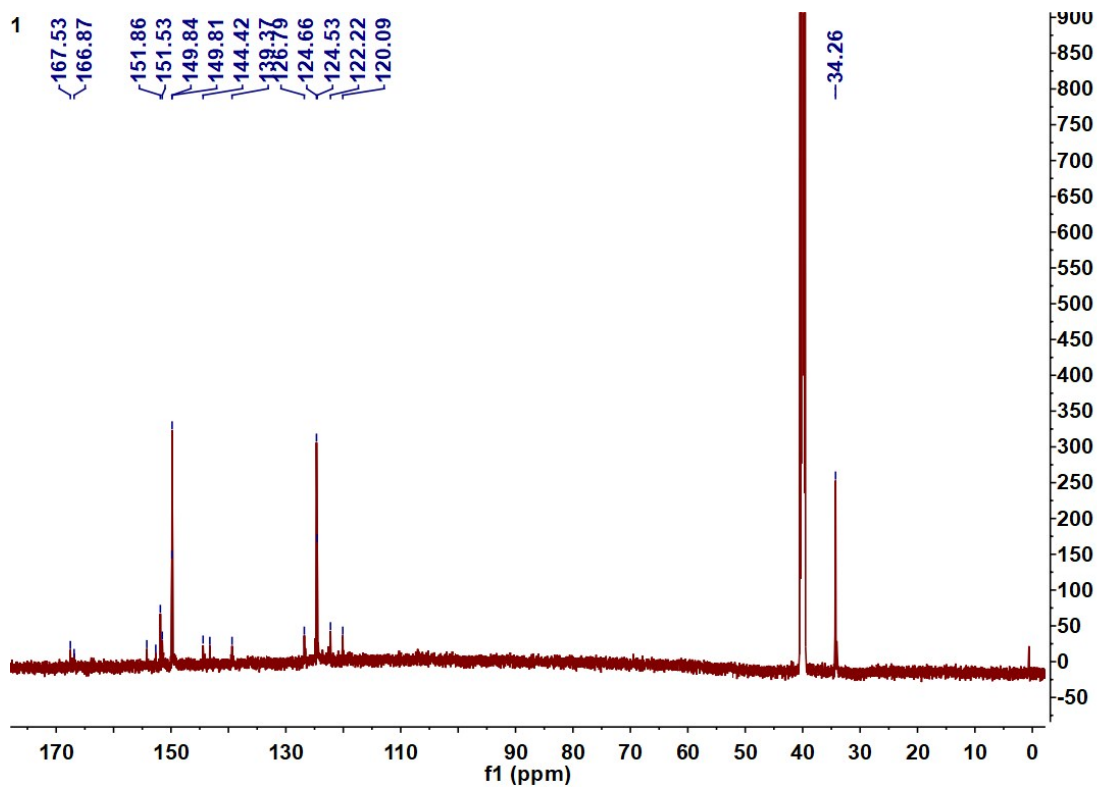

**Fig. S4.** The 151 MHz  $^{13}\text{C}$  NMR spectrum of **1** in the  $\text{DMSO-d}_6$  solution.

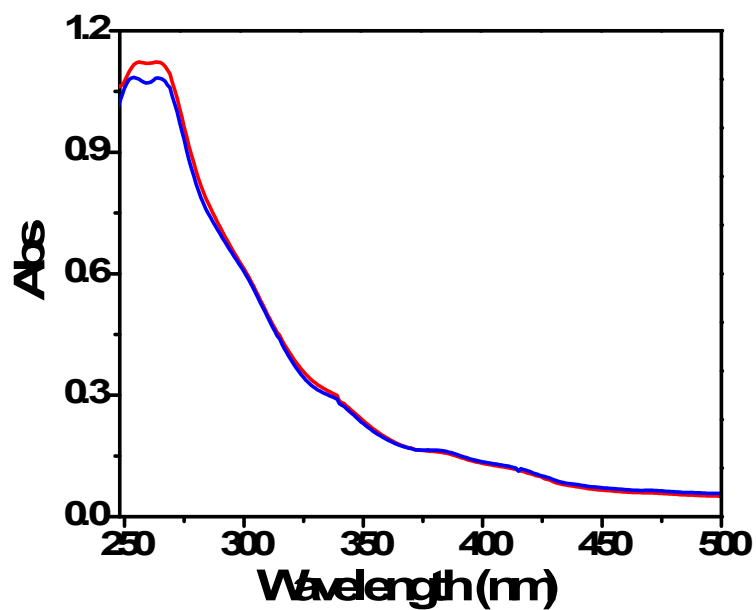

**Fig. S5.** The stability of **1** in the cell culture medium (RPMI-1640) (with 2% DMSO) for 72 h via UV-vis spectrophotometer.

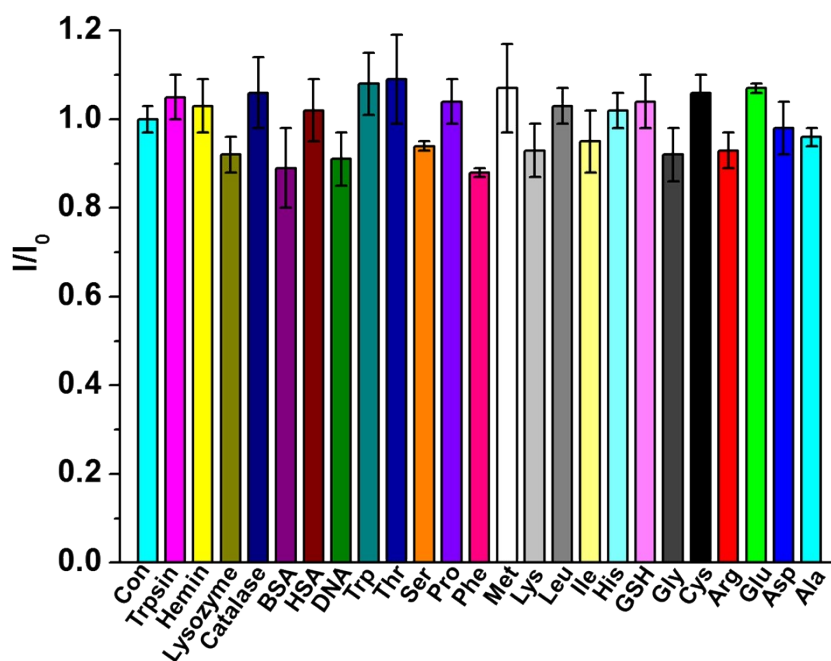

**Fig. S6.** The emission intensity at 479 nm of 10  $\mu\text{M}$  **1** in the absence of ( $I_0$ ) and in the presence of kinds of biological molecules ( $I$ ). The wavelength of excitation was at 405 nm.

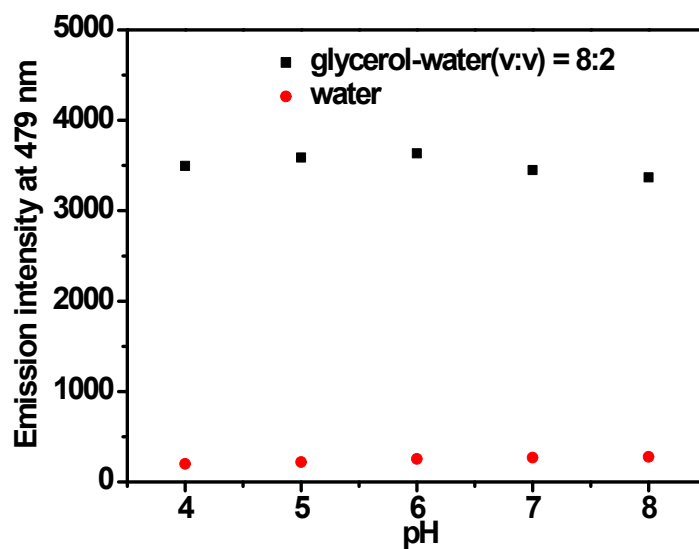

**Fig. S7.** The emission intensity at 479 nm of **1** in the pure water or in the 80% glycerol-water system with different pH values. The wavelength of excitation was at 405 nm.

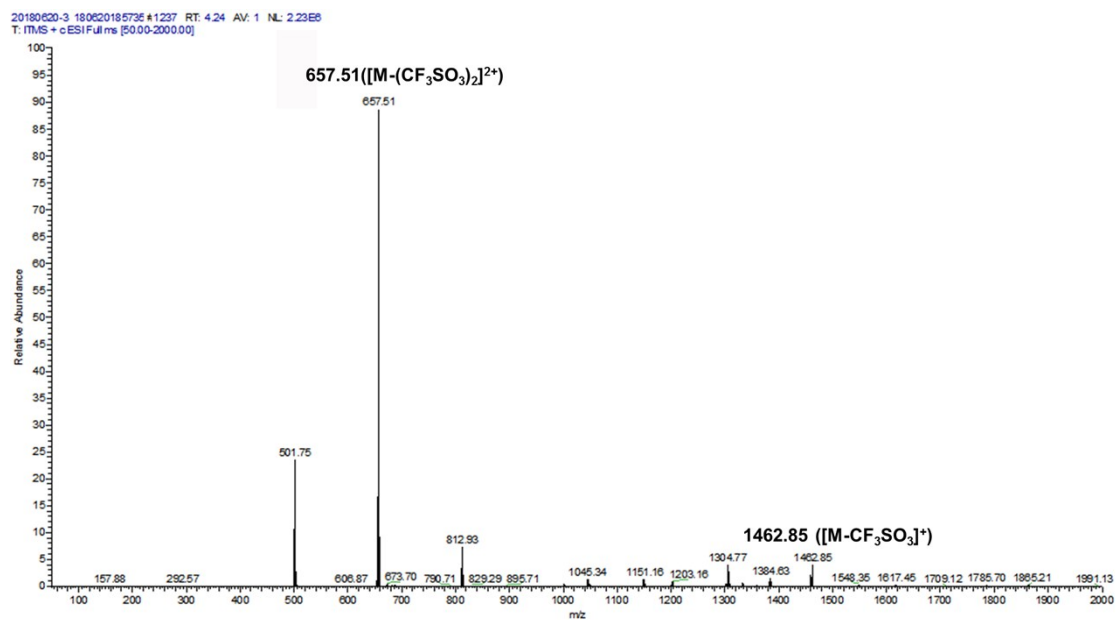

**Fig. S8.** The ESI-MS spectrum of **2**.

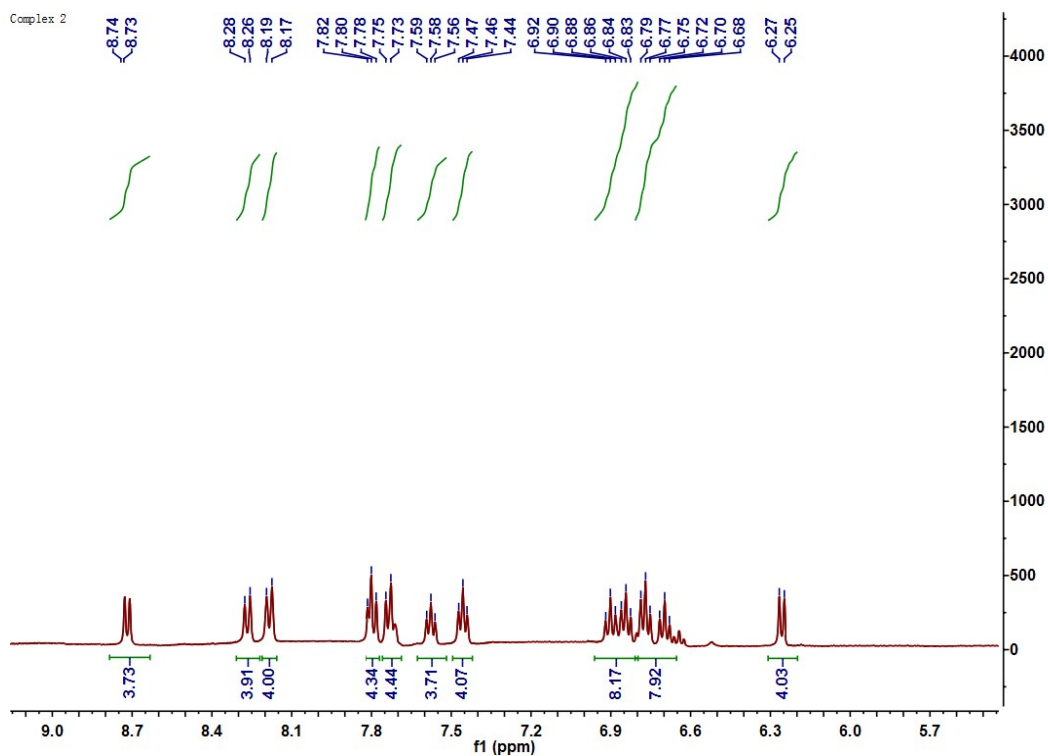

**Fig. S9.** The 400 MHz  $^1\text{H}$  NMR spectrum of **2** in the  $\text{DMSO-d}_6$  solution.

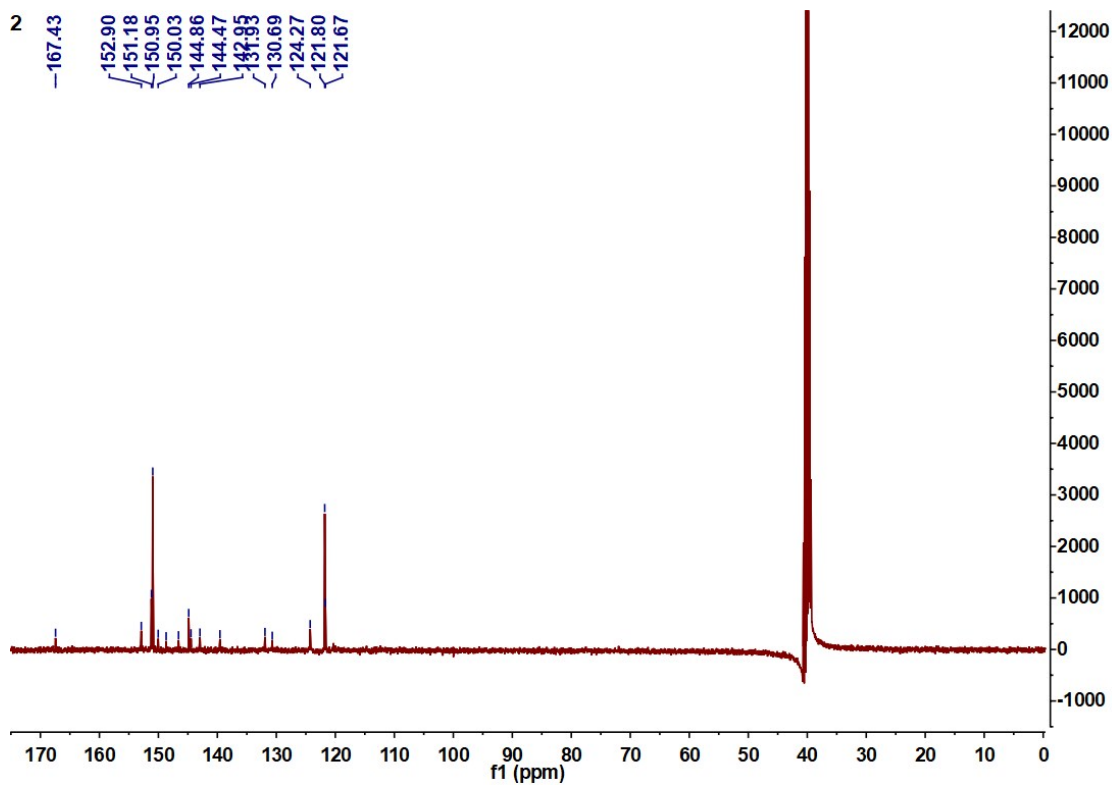

**Fig. S10.** The 101 MHz  $^{13}\text{C}$  NMR spectrum of **2** in the  $\text{DMSO-d}_6$  solution.



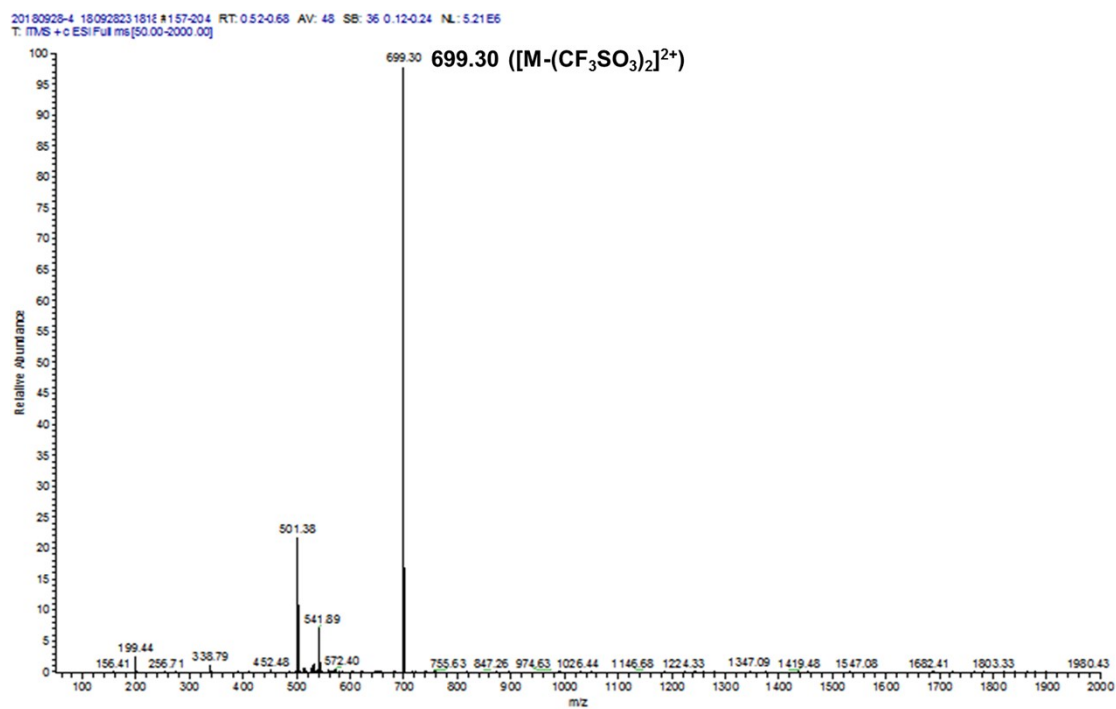

Fig. S11. The ESI-MS spectrum of **3**.

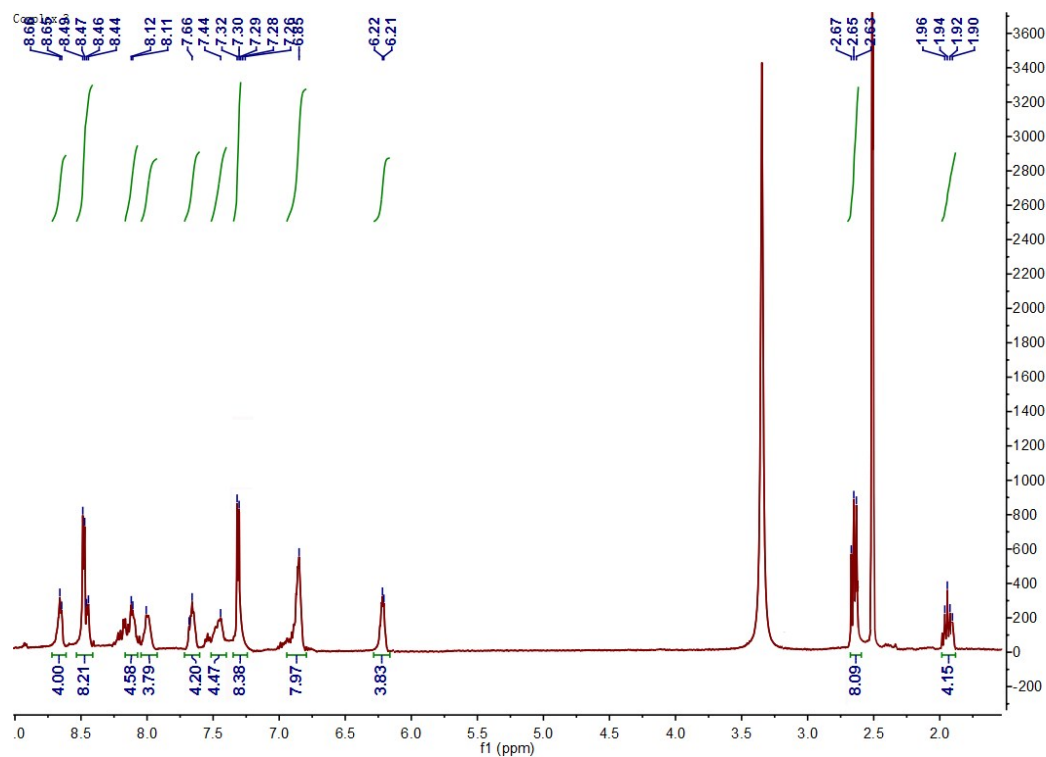

Fig. S12. The 400 MHz  $^1H$  NMR spectrum of **3** in the DMSO- $d_6$  solution.

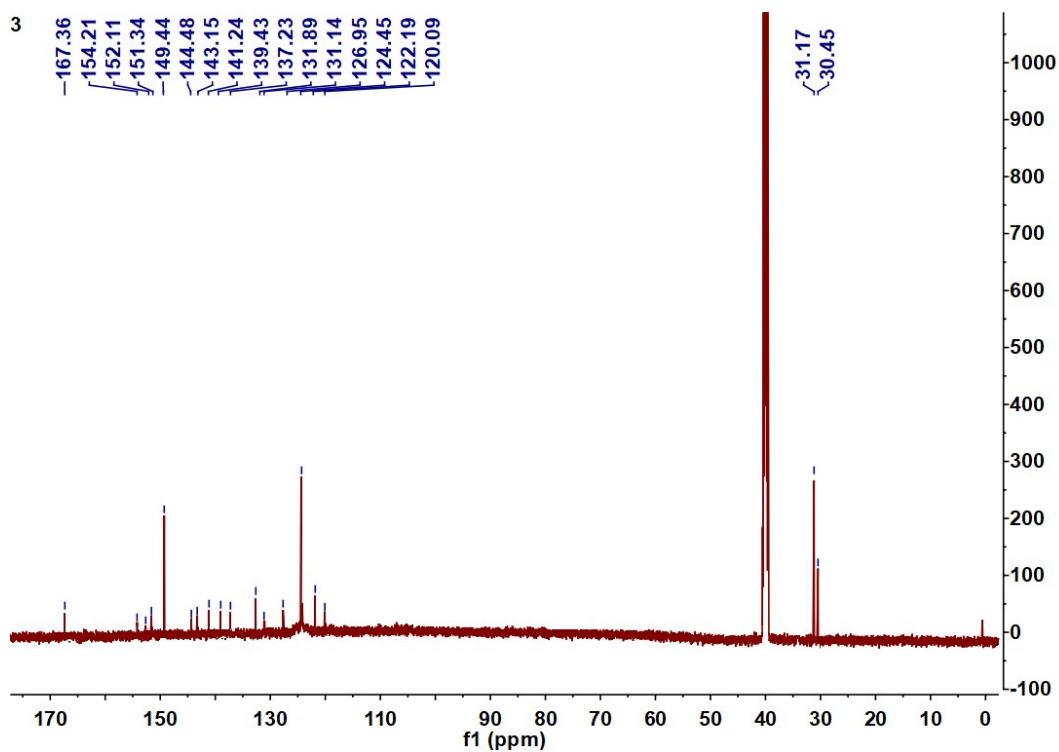

**Fig. S13.** The 151 MHz  $^{13}\text{C}$  NMR spectrum of **3** in the  $\text{DMSO-d}_6$  solution.

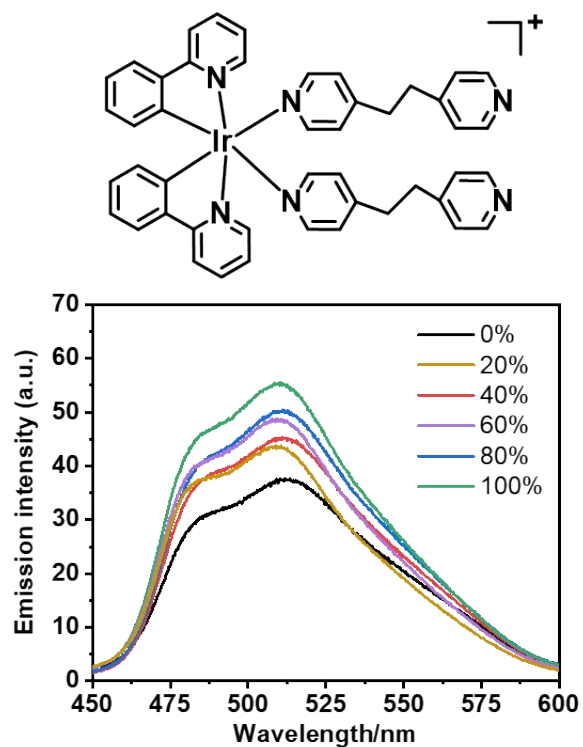

**Fig. S14.** The phosphorescence spectra of 10  $\mu\text{M}$  mononuclear iridium complex  $[\text{Ir}(\text{ppy})_2(\text{pyMe})_2]^+$  in the glycerol-water systems;  $\lambda_{\text{ex}} = 405 \text{ nm}$ .

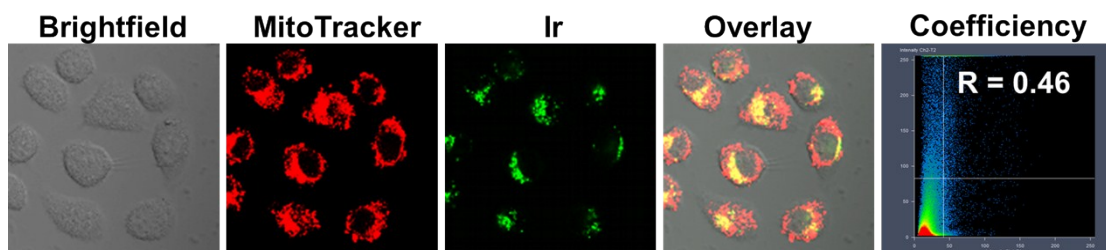

**Fig. S15.** Confocal microscopy images of A549 cells colabeled with **1** and MitoTracker<sup>®</sup>Red (MTR, 500 nM, 30 min); **1**:  $\lambda_{\text{ex}} = 405 \text{ nm}$ ,  $\lambda_{\text{em}} = 500 \pm 30 \text{ nm}$ ; **MTR**:  $\lambda_{\text{ex}} = 563 \text{ nm}$ ,  $\lambda_{\text{em}} = 710 \pm 30 \text{ nm}$ .

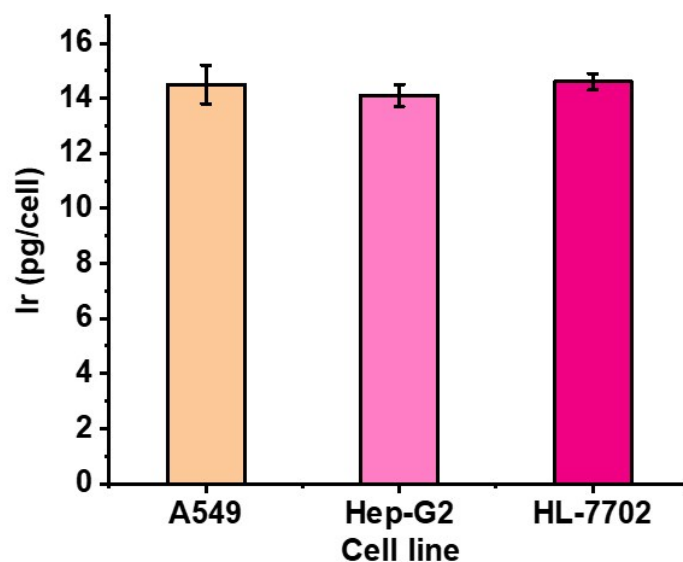

**Fig. S16.** Iridium concentrations determined in lysosome of the A549, Hep-G2 and HL-7702 cells with exposure to the iridium complex (10  $\mu\text{M}$ ) for 1 h by ICP-MS.

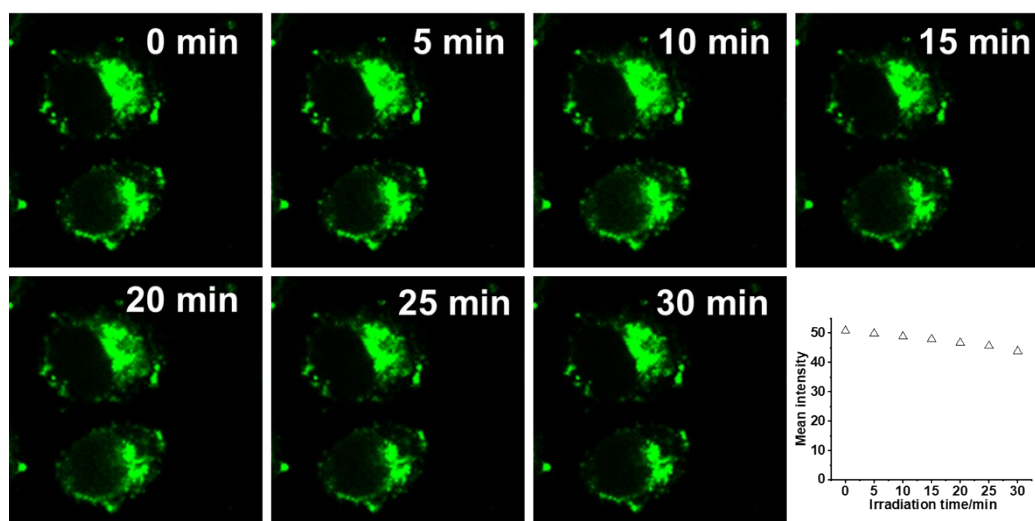

**Fig. S17.** Photostability experiments of **1** in the living cells. The images were taken under successive irradiation (0-30 min; 405 nm) and the mean intensities of the images under successive irradiation.

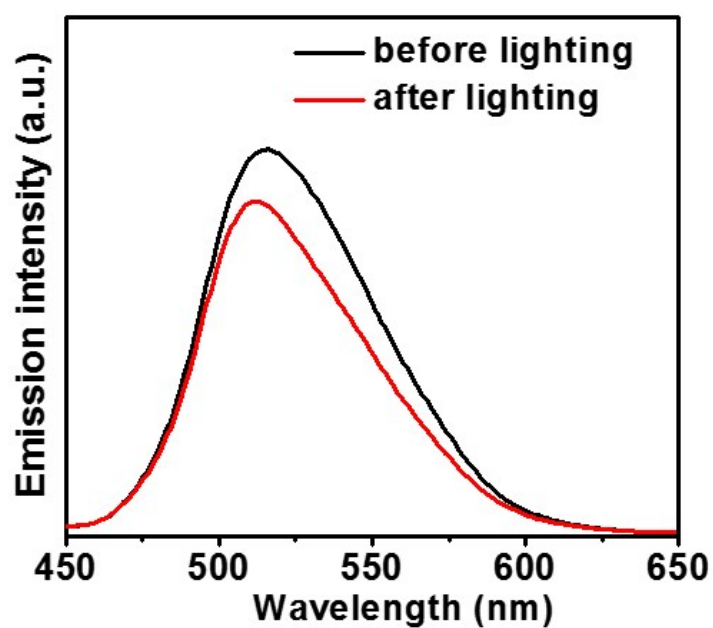

**Fig. S18.** Photostability of **1** before or after 405 nm irradiation for 30 min in PBS solution.

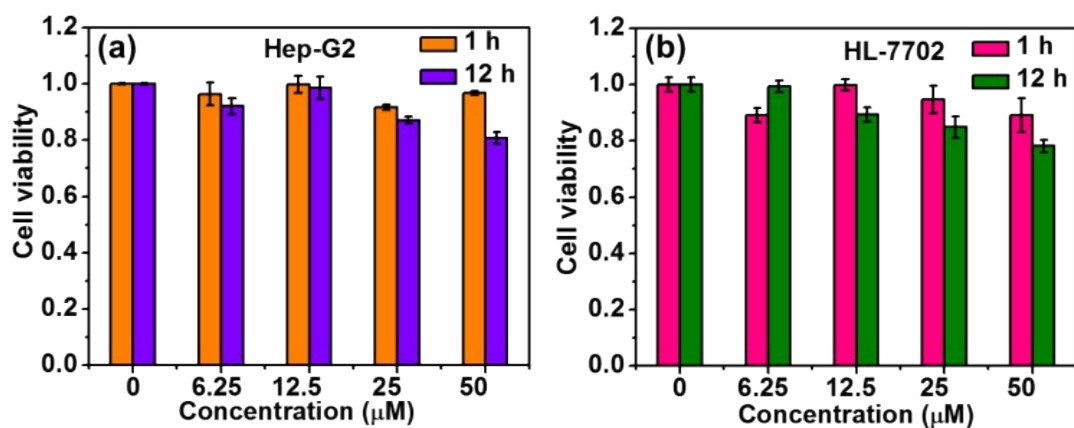

**Fig. S19.** The cell viabilities of (a) Hep-G2 and (b) HL-7702 cells treated with **1** for 1 h and 12 h, respectively.
